# Supplementary material
Source: HighWire-hosted journal article supplement (http://molpharm.aspetjournals.org/highwire/filestream/76528/field_highwire_adjunct_files/2/online_Figure2S.pdf)

Figure 2S

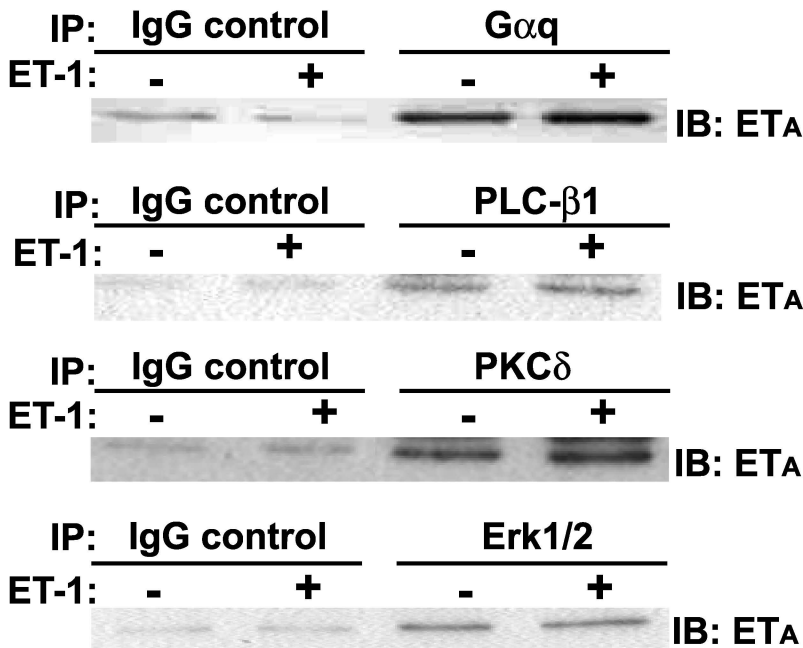

Supplement: online_Figure2S.pdf [file online_Figure2S.pdf]
